# Supplementary material
Source: PubMed Central journal article supplement (PMC3995130)
Supplement: NIHMS559961-supplement-302022R1_Acknowledgment_permissions.pdf [file NIHMS559961-supplement-302022R1_Acknowledgment_permissions.pdf]

## Circulation Research

---

**From:** Brady, Christopher <bradycd@njms.rutgers.edu>  
**Sent:** Wednesday, December 04, 2013 4:18 PM  
**To:** circulation.research@circresearch.com  
**Subject:** FW: Circulation Research Decision on Ms # CIRCRES/2013/302022R1  
**Attachments:** Fwd: Circulation Research Decision on Ms # CIRCRES/2013/302022R1 (64.9 KB)

To Whom It May Concern,

I give my permission to be acknowledged by name in the paper, "mTOR Signaling in Cardiac Physiology and Disease."

Please let me know if you need anything further.

Thank you,

Christopher D. Brady

---

From: [sciarrse@njms.rutgers.edu](mailto:sciarrse@njms.rutgers.edu) [sciarrse@njms.rutgers.edu]  
Sent: Wednesday, December 04, 2013 11:39  
To: Zablocki, Daniela; Brady, Christopher; Nagarajan, Narayani  
Cc: Sadoshima, Junichi; Sciarretta, Sebastiano  
Subject: Fwd: Circulation Research Decision on Ms # CIRCRES/2013/302022R1

Hi Daniela, Chris and Narayani,

I am glad to inform you that our review article entitled:"mTOR Signaling in Cardiac Physiology and Disease" has been accepted for publication in Circulation Research. You have been acknowledged in the manuscript for your important help.

As you can read in the decision letter, all the persons that have been acknowledged by name in the paper should send their permission to be acknowledged by email to [circulation.research@circresearch.com](mailto:circulation.research@circresearch.com). Please, could you do this as soon as possible? Thank you very much.

Best,

Sebastiano

--

Sebastiano Sciarretta, MD

Cardiovascular Research Institute,  
Department of Cell Biology and Molecular Medicine, UMDNJ, New Jersey Medical School, Newark, NJ

## Circulation Research

---

**From:** narayaninagarajan@gmail.com on behalf of narayani nagarajan  
<nagarana@gsbs.rutgers.edu>  
**Sent:** Wednesday, December 04, 2013 9:29 PM  
**To:** circulation.research@circresearch.com  
**Cc:** Sadoshima, Junichi  
**Subject:** CIRCRES/2013/302022R1: TOR Signaling in Cardiac Physiology and Disease

Dear Editor- Circulation Research,

Good day. I would like to give permission to the publishers and authors of the manuscript {reference no: CIRCRES/2013/302022R1: TOR Signaling in Cardiac Physiology and Disease} for including my name in the acknowledgements.

Thank you,  
Narayani Nagarajan

--

Narayani Nagarajan  
PhD Candidate  
Sadoshima's Lab  
185 S Orange Avenue  
Medical Science Building, Room I-543  
Newark, NJ 07103  
USA

## Circulation Research

---

**From:** Daniela K Zablocki <zablocdk@njms.rutgers.edu>  
**Sent:** Thursday, December 05, 2013 3:57 PM  
**To:** circulation.research@circresearch.com  
**Cc:** sadoshju@njms.rutgers.edu; sciarrse@njms.rutgers.edu  
**Subject:** RE: CIRCRES/2013/302022R1: TOR Signaling in Cardiac Physiology and Disease

RE: CIRCRES/2013/302022R1: TOR Signaling in Cardiac Physiology and Disease

I hereby give permission to have my name acknowledged in the above-noted manuscript.

Sincerely,

Daniela Zablocki

-----  
Daniela Zablocki  
New Jersey Medical School, CBMM/CVRI  
Rutgers, The State University of New Jersey  
185 South Orange Ave, MSB I543  
Newark, NJ 07103  
Phone: 973-972-8916  
Fax: 973-972-8919
